# Supplementary material
Source: PubMed Central journal article supplement (PMC2773654)
Supplement: NIHMS155500-supplement-Supp_figs_1___2.pdf [file NIHMS155500-supplement-Supp_figs_1___2.pdf]

**Supporting Information:**

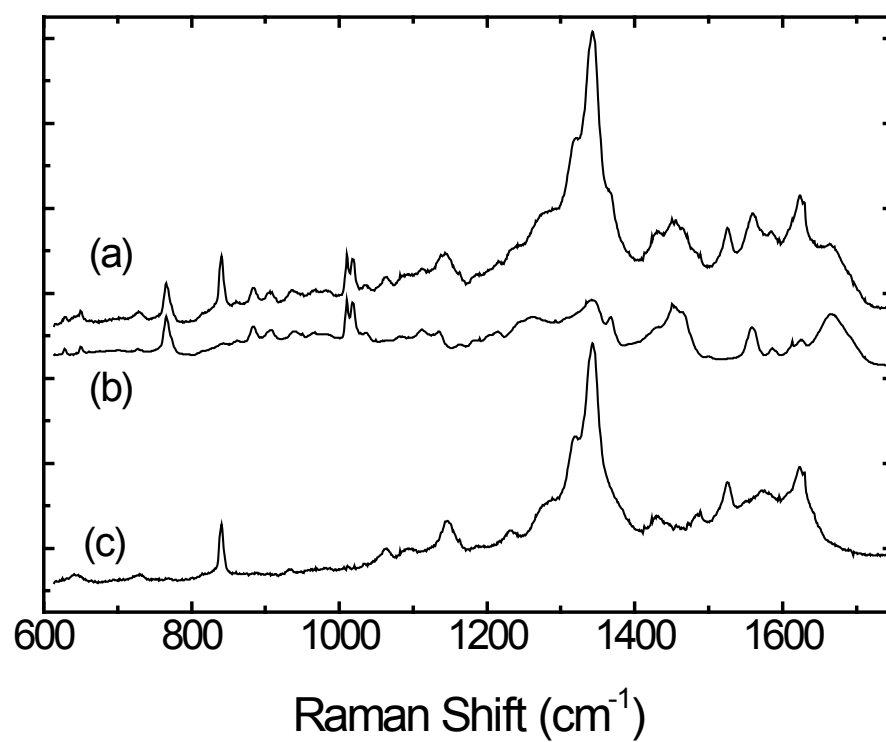

Figure S1: DCDR Raman spectra of (a) DNPH-oxiLys, (b) lysozyme control and (c) difference spectrum between (a) and (b).

## 2: DCDR protein library spectral acquisition

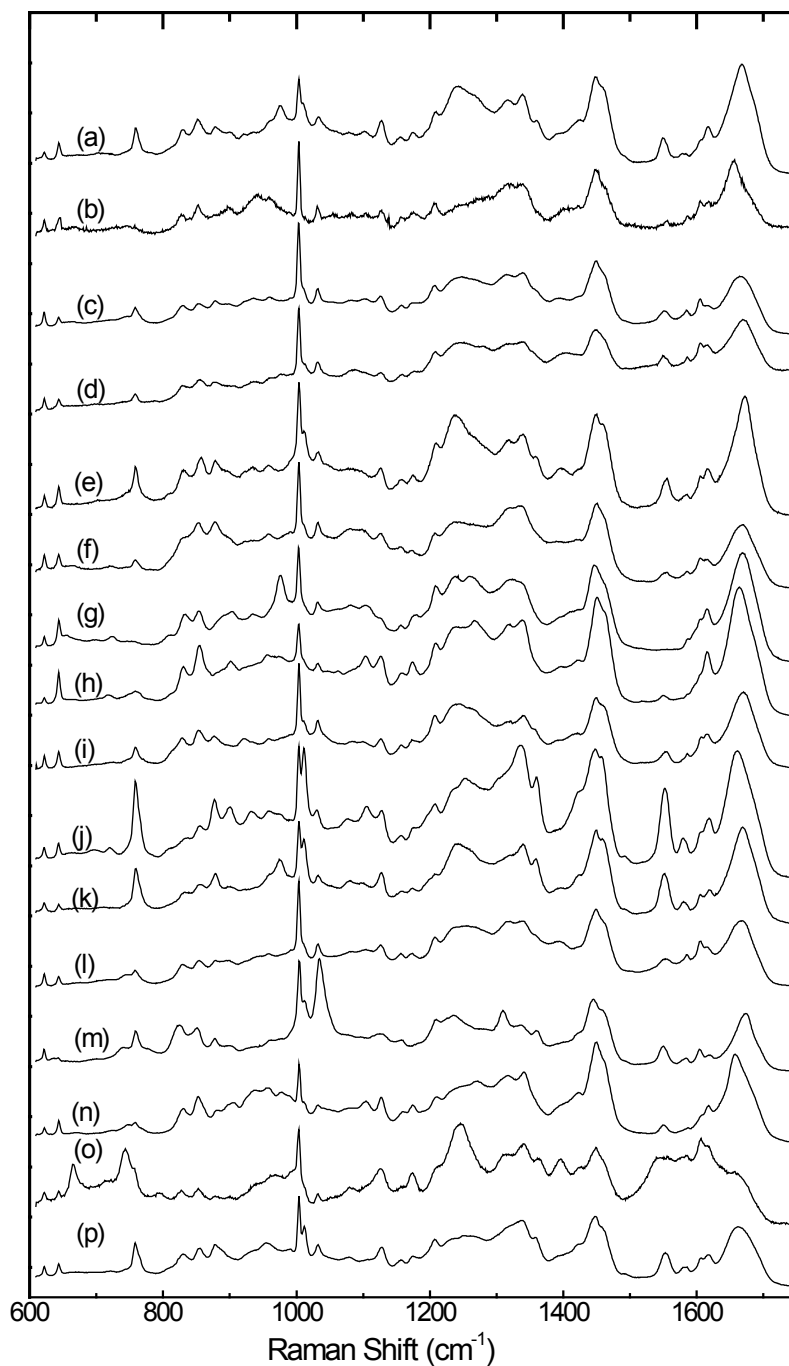

Figure S2: Protein Raman library spectrum obtained with (a) Trypsin, (b) BSA, (c) Thyroglobulin, (d) Thaumain, (e) globulin, (f) Urease, (g) ribonuclease, (h) Protease, (i) Pepsin, (j) lysozyme, (k) Chymotrypsin, (l) cholinesterase, (m) avidin, (n) aldose, (o)  $\alpha$ -lactoglobulin, (p) aconitase. Spectra were scaled and offset for clarity.
